# Supplementary material for: Thermodynamic and aggregation properties of aza- and imino-substituted gemini surfactants designed for gene delivery
Source: Royal Society of Chemistry journal article supplement (doi:10.1039/b613269c), 2006-12-14
Supplement: b613269c.pdf [file b613269c.pdf]

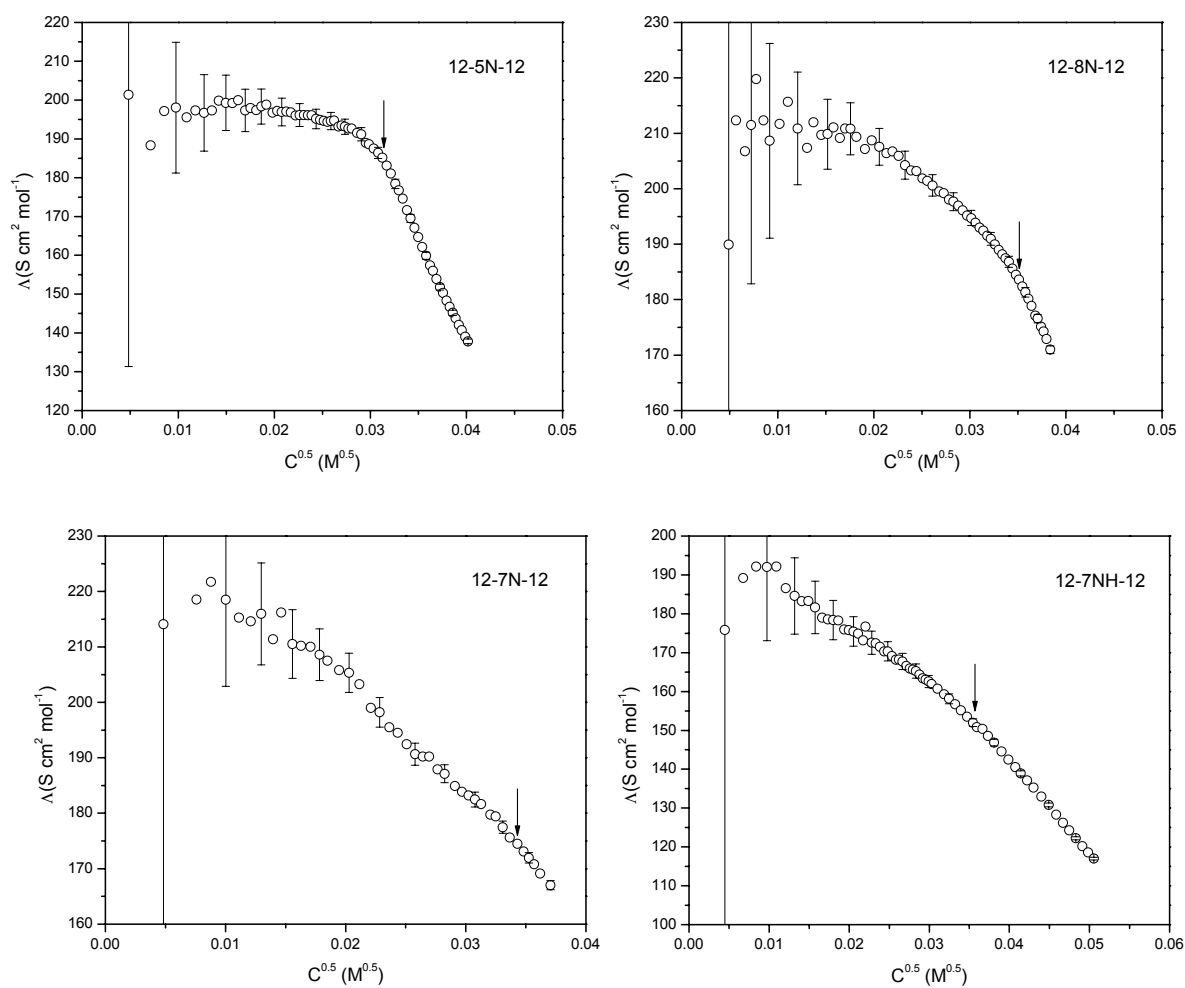

FIGURE S1: Molecular conductance vs.  $C^{0.5}$  for the amine substituted gemini surfactants. Results obtained in degassed water and a  $\text{CO}_2$ -free atmosphere. Arrows indicate the cmc values as determined from specific conductivity measurements.

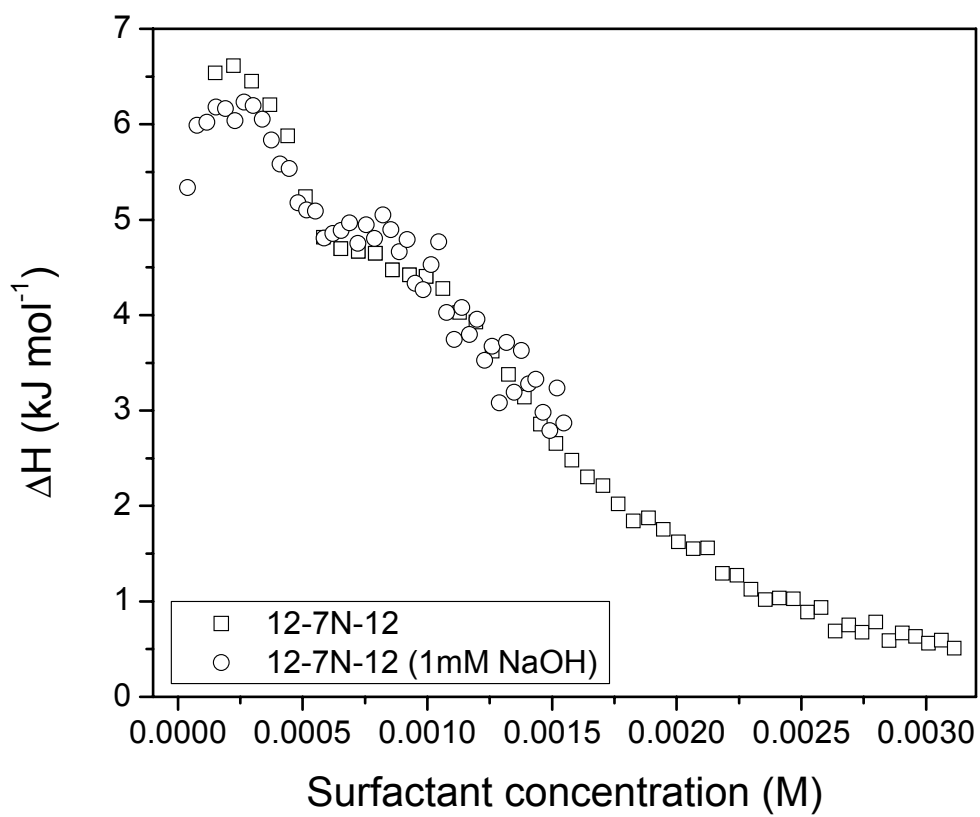

FIGURE S2: Enthalpy profiles for the 12-7N-12 compound in water and aqueous 1 mM NaOH
